# Supplementary material
Source: PubMed Central journal article supplement (PMC3309520)
Supplement: tp201117x1.pdf [file tp201117x1.pdf]

## DISCOVERY SAMPLE

| Brain ID# | Plate | Dx      | Age | Sex | PMI | DESCRIPTIVE STATISTICS |                |               |
|-----------|-------|---------|-----|-----|-----|------------------------|----------------|---------------|
| AN00142   | P1    | Control | 44  | M   | 25  | ALL                    |                |               |
| AN00317   | P1    | Control | 64  | M   | 30  |                        | <b>Average</b> | <b>St.Dev</b> |
| AN00332   | P1    | Control | 75  | F   | 25  | <b>Age</b>             | 62.4           | 12.7          |
| AN00445   | P1    | Control | 78  | M   | 25  | <b>PMI</b>             | 23.2           | 5.5           |
| AN00452   | P1    | Control | 58  | M   | 18  |                        |                |               |
| AN00544   | P1    | Control | 17  | M   | 29  | Males                  | 147            |               |
| AN00559   | P1    | Control | 64  | M   | 23  | Females                | 43             |               |
| AN00614   | P1    | Control | 69  | F   | 8   |                        |                |               |
| AN01000   | P1    | Control | 74  | F   | 23  |                        |                |               |
| AN01356   | P1    | Control | 55  | M   | 29  |                        |                |               |
| AN01410   | P1    | Control | 41  | M   | 27  |                        |                |               |
| AN01614   | P1    | Control | 80  | M   | 19  | PLATE 1                |                |               |
| AN01787   | P1    | Control | 56  | M   | 21  |                        | <b>Average</b> | <b>St.Dev</b> |
| AN01898   | P1    | Control | 77  | F   | 28  | <b>Age</b>             | 62.1           | 13.4          |
| AN02579   | P1    | Control | 74  | M   | 30  | <b>PMI</b>             | 23.1           | 5.2           |
| AN02896   | P1    | Control | 55  | M   | 15  |                        |                |               |
| AN02937   | P1    | Control | 72  | M   | 25  | Males                  | 75             |               |
| AN03104   | P1    | Control | 61  | M   | 20  | Females                | 22             |               |
| AN03217   | P1    | Control | 19  | M   | 19  |                        |                |               |
| AN03375   | P1    | Control | 75  | M   | 21  |                        |                |               |
| AN03488   | P1    | Control | 74  | M   | 23  |                        |                |               |
| AN03874   | P1    | Control | 71  | F   | 25  |                        |                |               |
| AN03994   | P1    | Control | 67  | M   | 20  | PLATE 2                |                |               |
| AN04058   | P1    | Control | 78  | F   | 24  |                        | <b>Average</b> | <b>St.Dev</b> |
| AN04100   | P1    | Control | 57  | M   | 21  | <b>Age</b>             | 62.7           | 11.9          |
| AN04276   | P1    | Control | 72  | M   | 18  | <b>PMI</b>             | 23.3           | 5.7           |
| AN04555   | P1    | Control | 52  | M   | 23  |                        |                |               |
| AN04568   | P1    | Control | 71  | M   | 23  | Males                  | 72             |               |
| AN04917   | P1    | Control | 65  | M   | 21  | Females                | 21             |               |
| AN04923   | P1    | Control | 78  | M   | 25  |                        |                |               |
| AN05341   | P1    | Control | 61  | M   | 23  |                        |                |               |
| AN05581   | P1    | Control | 65  | M   | 20  |                        |                |               |
| AN05583   | P1    | Control | 86  | F   | 7   |                        |                |               |
| AN05671   | P1    | Control | 58  | M   | 16  |                        |                |               |
| AN05874   | P1    | Control | 63  | M   | 24  |                        |                |               |
| AN05997   | P1    | Control | 55  | M   | 35  |                        |                |               |
| AN06004   | P1    | Control | 75  | M   | 20  |                        |                |               |
| AN06221   | P1    | Control | 82  | M   | 24  |                        |                |               |
| AN06291   | P1    | Control | 87  | M   | 27  |                        |                |               |
| AN07239   | P1    | Control | 65  | F   | 25  |                        |                |               |
| AN08022   | P1    | Control | 59  | M   | 20  |                        |                |               |
| AN08046   | P1    | Control | 62  | M   | 35  |                        |                |               |
| AN08220   | P1    | Control | 60  | F   | 19  |                        |                |               |
| AN08704   | P1    | Control | 70  | M   | 24  |                        |                |               |
| AN08790   | P1    | Control | 58  | F   | 21  |                        |                |               |
| AN09568   | P1    | Control | 57  | M   | 28  |                        |                |               |
| AN09882   | P1    | Control | 70  | M   | 26  |                        |                |               |

|         |    |         |      |    |
|---------|----|---------|------|----|
| AN10090 | P1 | Control | 52 M | 13 |
| AN10394 | P1 | Control | 68 F | 24 |
| AN10642 | P1 | Control | 72 M | 19 |
| AN10833 | P1 | Control | 22 M | 21 |
| AN10915 | P1 | Control | 69 M | 21 |
| AN10978 | P1 | Control | 62 M | 24 |
| AN11114 | P1 | Control | 58 M | 21 |
| AN11537 | P1 | Control | 60 F | 13 |
| AN11864 | P1 | Control | 57 M | 22 |
| AN11937 | P1 | Control | 63 F | 24 |
| AN12068 | P1 | Control | 72 F | 23 |
| AN12089 | P1 | Control | 56 M | 28 |
| AN12137 | P1 | Control | 31 M | 33 |
| AN12203 | P1 | Control | 75 F | 17 |
| AN12416 | P1 | Control | 64 M | 27 |
| AN12699 | P1 | Control | 55 M | 11 |
| AN12786 | P1 | Control | 68 M | 24 |
| AN12916 | P1 | Control | 77 M | 25 |
| AN12954 | P1 | Control | 51 M | 29 |
| AN13041 | P1 | Control | 63 M | 18 |
| AN13125 | P1 | Control | 54 M | 25 |
| AN13140 | P1 | Control | 66 M | 24 |
| AN13295 | P1 | Control | 56 M | 22 |
| AN13490 | P1 | Control | 65 M | 23 |
| AN13510 | P1 | Control | 79 F | 23 |
| AN13565 | P1 | Control | 65 F | 24 |
| AN13627 | P1 | Control | 61 M | 28 |
| AN13687 | P1 | Control | 73 F | 25 |
| AN13860 | P1 | Control | 52 M | 28 |
| AN13899 | P1 | Control | 60 M | 25 |
| AN14109 | P1 | Control | 72 M | 25 |
| AN14384 | P1 | Control | 60 M | 23 |
| AN14436 | P1 | Control | 55 M | 26 |
| AN14867 | P1 | Control | 58 F | 32 |
| AN15073 | P1 | Control | 68 M | 22 |
| AN15392 | P1 | Control | 51 M | 38 |
| AN15414 | P1 | Control | 59 M | 23 |
| AN16017 | P1 | Control | 55 M | 19 |
| AN16086 | P1 | Control | 25 M | 17 |
| AN16458 | P1 | Control | 42 F | 20 |
| AN16790 | P1 | Control | 68 M | 26 |
| AN16935 | P1 | Control | 65 F | 30 |
| AN17133 | P1 | Control | 50 M | 25 |
| AN17256 | P1 | Control | 71 M | 20 |
| AN17649 | P1 | Control | 74 M | 16 |
| AN17687 | P1 | Control | 53 M | 20 |
| AN17758 | P1 | Control | 51 M | 26 |
| AN17868 | P1 | Control | 46 M | 19 |
| AN18592 | P1 | Control | 82 F | 24 |
| AN19202 | P1 | Control | 64 M | 28 |

|         |    |         |      |    |
|---------|----|---------|------|----|
| AN00666 | P2 | Control | 65 M | 19 |
| AN00990 | P2 | Control | 82 M | 17 |
| AN01083 | P2 | Control | 74 M | 28 |
| AN01107 | P2 | Control | 63 M | 23 |
| AN01186 | P2 | Control | 74 M | 14 |
| AN01275 | P2 | Control | 61 M | 10 |
| AN01509 | P2 | Control | 77 M | 25 |
| AN01534 | P2 | Control | 51 M | 29 |
| AN01685 | P2 | Control | 53 M | 24 |
| AN01852 | P2 | Control | 71 F | 21 |
| AN02354 | P2 | Control | 71 M | 40 |
| AN02826 | P2 | Control | 68 M | 24 |
| AN02883 | P2 | Control | 58 M | 27 |
| AN03233 | P2 | Control | 62 M | 18 |
| AN03389 | P2 | Control | 69 F | 19 |
| AN03398 | P2 | Control | 75 F | 12 |
| AN03891 | P2 | Control | 61 F | 24 |
| AN03999 | P2 | Control | 52 M | 23 |
| AN04193 | P2 | Control | 68 M | 18 |
| AN04241 | P2 | Control | 53 M | 24 |
| AN04373 | P2 | Control | 74 M | 35 |
| AN04648 | P2 | Control | 73 M | 33 |
| AN04660 | P2 | Control | 66 M | 23 |
| AN04794 | P2 | Control | 48 M | 30 |
| AN04969 | P2 | Control | 60 F | 22 |
| AN05102 | P2 | Control | 54 M | 24 |
| AN05483 | P2 | Control | 66 M | 17 |
| AN05666 | P2 | Control | 46 M | 30 |
| AN06102 | P2 | Control | 53 F | 17 |
| AN06190 | P2 | Control | 74 F | 17 |
| AN06598 | P2 | Control | 88 M | 11 |
| AN06708 | P2 | Control | 56 M | 27 |
| AN06749 | P2 | Control | 75 M | 24 |
| AN06814 | P2 | Control | 76 M | 22 |
| AN06965 | P2 | Control | 46 M | 32 |
| AN07160 | P2 | Control | 73 M | 22 |
| AN07176 | P2 | Control | 21 M | 30 |
| AN07465 | P2 | Control | 63 M | 24 |
| AN07576 | P2 | Control | 51 M | 20 |
| AN07624 | P2 | Control | 61 M | 15 |
| AN07907 | P2 | Control | 64 M | 19 |
| AN07953 | P2 | Control | 62 F | 29 |
| AN08188 | P2 | Control | 69 F | 36 |
| AN08265 | P2 | Control | 52 M | 18 |
| AN08677 | P2 | Control | 38 M | 25 |
| AN08807 | P2 | Control | 66 M | 32 |
| AN09007 | P2 | Control | 52 F | 22 |
| AN09010 | P2 | Control | 78 F | 19 |
| AN09208 | P2 | Control | 69 M | 23 |
| AN09344 | P2 | Control | 57 M | 34 |

|         |    |         |      |    |
|---------|----|---------|------|----|
| AN09545 | P2 | Control | 72 M | 25 |
| AN09667 | P2 | Control | 80 M | 16 |
| AN09734 | P2 | Control | 55 M | 26 |
| AN10028 | P2 | Control | 36 M | 21 |
| AN10155 | P2 | Control | 72 M | 22 |
| AN10160 | P2 | Control | 57 M | 20 |
| AN10212 | P2 | Control | 74 M | 21 |
| AN10348 | P2 | Control | 68 M | 32 |
| AN10388 | P2 | Control | 80 F | 22 |
| AN10546 | P2 | Control | 58 M | 29 |
| AN10671 | P2 | Control | 58 F | 31 |
| AN10723 | P2 | Control | 60 M | 24 |
| AN10897 | P2 | Control | 57 M | 24 |
| AN11126 | P2 | Control | 71 F | 22 |
| AN11355 | P2 | Control | 71 F | 22 |
| AN11618 | P2 | Control | 61 M | 26 |
| AN11791 | P2 | Control | 70 M | 21 |
| AN12613 | P2 | Control | 55 F | 29 |
| AN13021 | P2 | Control | 65 M | 23 |
| AN13112 | P2 | Control | 63 M | 18 |
| AN13285 | P2 | Control | 72 M | 23 |
| AN13504 | P2 | Control | 53 M | 20 |
| AN13603 | P2 | Control | 61 M | 25 |
| AN13797 | P2 | Control | 61 M | 17 |
| AN14188 | P2 | Control | 58 F | 27 |
| AN14534 | P2 | Control | 51 M | 28 |
| AN14811 | P2 | Control | 67 F | 23 |
| AN14913 | P2 | Control | 79 F | 15 |
| AN15458 | P2 | Control | 73 M | 19 |
| AN15556 | P2 | Control | 65 M | 16 |
| AN15594 | P2 | Control | 51 M | 22 |
| AN15717 | P2 | Control | 60 M | 30 |
| AN16146 | P2 | Control | 60 M | 23 |
| AN16161 | P2 | Control | 56 M | 26 |
| AN16293 | P2 | Control | 71 M | 14 |
| AN16568 | P2 | Control | 63 F | 27 |
| AN16726 | P2 | Control | 44 M | 28 |
| AN17786 | P2 | Control | 50 M | 15 |
| AN18039 | P2 | Control | 68 M | 25 |
| AN18771 | P2 | Control | 93 F | 30 |
| AN18816 | P2 | Control | 69 M | 26 |
| AN19418 | P2 | Control | 58 M | 20 |
| AN19760 | P2 | Control | 28 M | 23 |

## REPLICATION SAMPLE

| Source | ID   | Status  | Age | Sex    | PMI |
|--------|------|---------|-----|--------|-----|
| HBTRC  | 5840 | case    | 75  | female | 24  |
| HBTRC  | 5858 | case    | 71  | male   | 18  |
| HBTRC  | 5865 | case    | 75  | male   | 24  |
| HBTRC  | 5929 | case    | 74  | female | 18  |
| HBTRC  | 6107 | case    | 85  | male   | 19  |
| HBTRC  | 6120 | case    | 61  | male   | 17  |
| HBTRC  | 6171 | case    | 54  | female | 19  |
| HBTRC  | 6215 | case    | 82  | male   | 15  |
| HBTRC  | 6280 | case    | 67  | male   | 18  |
| HBTRC  | 6387 | case    | 61  | female | 21  |
| HBTRC  | 6394 | case    | 76  | male   | 17  |
| HBTRC  | 6489 | case    | 71  | male   | 17  |
| HBTRC  | 6518 | case    | 63  | male   | 18  |
| HBTRC  | 6524 | case    | 84  | female | 17  |
| HBTRC  | 6554 | case    | 73  | female | 19  |
| HBTRC  | 6575 | case    | 67  | male   | 23  |
| HBTRC  | 6582 | case    | 80  | female | 20  |
| HBTRC  | 6585 | case    | 75  | male   | 16  |
| HBTRC  | 6600 | case    | 78  | female | 17  |
| HBTRC  | 6610 | case    | 72  | male   | 25  |
| HBTRC  | 6612 | case    | 83  | male   | 17  |
| HBTRC  | 6681 | case    | 76  | female | 26  |
| HBTRC  | 5058 | control | 85  | male   | 20  |
| HBTRC  | 5074 | control | 79  | male   | 21  |
| HBTRC  | 5082 | control | 78  | female | 24  |
| HBTRC  | 5463 | control | 74  | female | 19  |
| HBTRC  | 5832 | control | 75  | female | 17  |
| HBTRC  | 5919 | control | 80  | male   | 19  |
| HBTRC  | 5959 | control | 53  | female | 17  |
| HBTRC  | 5980 | control | 71  | male   | 20  |
| HBTRC  | 5984 | control | 81  | female | 17  |
| HBTRC  | 6152 | control | 73  | male   | 19  |
| HBTRC  | 6172 | control | 71  | female | 20  |
| HBTRC  | 6326 | control | 80  | male   | 16  |
| HBTRC  | 6384 | control | 76  | male   | 21  |
| HBTRC  | 6400 | control | 63  | male   | 18  |
| HBTRC  | 6436 | control | 78  | female | 23  |
| HBTRC  | 6454 | control | 74  | male   | 19  |
| HBTRC  | 6457 | control | 61  | male   | 15  |
| HBTRC  | 6520 | control | 65  | male   | 19  |
| HBTRC  | 6521 | control | 64  | male   | 23  |
| HBTRC  | 6549 | control | 72  | male   | 19  |
| HBTRC  | 6573 | control | 79  | female | 15  |
| HBTRC  | 6580 | control | 71  | male   | 23  |
| HBTRC  | 6609 | control | 80  | female | 27  |
| HBTRC  | 6656 | control | 60  | female | 22  |
| JHBRC  | 1031 | case    | 86  | female | 6   |

|       |             |           |    |
|-------|-------------|-----------|----|
| JHBRC | 1272 case   | 84 female | 5  |
| JHBRC | 1276 case   | 76 female | 2  |
| JHBRC | 1315 case   | 88 female | 10 |
| JHBRC | 1317 case   | 81 female | 5  |
| JHBRC | 1339 case   | 74 female | 8  |
| JHBRC | 1342 case   | 88 female | 5  |
| JHBRC | 1349 case   | 76 female | 8  |
| JHBRC | 1375 case   | 93 female | 12 |
| JHBRC | 1431 case   | 87 female | 8  |
| JHBRC | 1457 case   | 85 female | 6  |
| JHBRC | 1522 case   | 87 female | 6  |
| JHBRC | 1524 case   | 74 female | 5  |
| JHBRC | 1529 case   | 87 female | 5  |
| JHBRC | 1532 case   | 82 male   | 4  |
| JHBRC | 1540 case   | 82 female | 6  |
| JHBRC | 1550 case   | 79 female | 12 |
| JHBRC | 1558 case   | 83 female | 6  |
| JHBRC | 1565 case   | 81 female | 10 |
| JHBRC | 1575 case   | 93 female | 12 |
| JHBRC | 1583 case   | 80 male   | 3  |
| JHBRC | 1592 case   | 86 female | 5  |
| JHBRC | 1600 case   | 91 female | 5  |
| JHBRC | 1610 case   | 92 female | 6  |
| JHBRC | 1612 case   | 81 male   | 4  |
| JHBRC | 1617 case   | 85 female | 9  |
| JHBRC | 1619 case   | 84 female | 2  |
| JHBRC | 1627 case   | 87 female | 12 |
| JHBRC | 1639 case   | 81 male   | 5  |
| JHBRC | 1645 case   | 89 male   | 12 |
| JHBRC | 1655 case   | 92 female | 8  |
| JHBRC | 1661 case   | 78 male   | 4  |
| JHBRC | 1685 case   | 86 male   | 14 |
| JHBRC | 1714 case   | 80 female | 6  |
| JHBRC | 1756 case   | 80 male   | 9  |
| JHBRC | 1760 case   | 92 female | 9  |
| JHBRC | 1768 case   | 78 female | 19 |
| JHBRC | 1784 case   | 85 female | 4  |
| JHBRC | 1803 case   | 83 female | 16 |
| JHBRC | 1939 case   | 80 female | 4  |
| JHBRC | 286 control | 66 male   | 6  |
| JHBRC | 399 control | 79 female | 24 |
| JHBRC | 417 control | 80 female | 6  |
| JHBRC | 487 control | 73 male   | 22 |
| JHBRC | 556 control | 61 female | 15 |
| JHBRC | 631 control | 88 male   | 10 |
| JHBRC | 710 control | 62 male   | 14 |
| JHBRC | 713 control | 73 female | 9  |
| JHBRC | 718 control | 83 female | 8  |
| JHBRC | 783 control | 67 male   | 8  |
| JHBRC | 905 control | 72 male   | 16 |

|       |              |           |    |
|-------|--------------|-----------|----|
| JHBRC | 961 control  | 58 female | 6  |
| JHBRC | 991 control  | 35 female | 8  |
| JHBRC | 993 control  | 66 male   | 12 |
| JHBRC | 994 control  | 49 male   | 12 |
| JHBRC | 995 control  | 59 male   | 12 |
| JHBRC | 1036 control | 81 male   | 20 |
| JHBRC | 1172 control | 77 male   | 13 |
| JHBRC | 1277 control | 80 female | 8  |
| JHBRC | 1306 control | 87 male   | 17 |
| JHBRC | 1312 control | 80 male   | 22 |
| JHBRC | 1517 control | 71 female | 16 |
| JHBRC | 1591 control | 95 male   | 16 |
| JHBRC | 1613 control | 74 male   | 4  |
| JHBRC | 1683 control | 91 female | 8  |
| JHBRC | 2 control    | 43 male   | 10 |
| JHBRC | 4 control    | 42 male   | 19 |
| JHBRC | 5 control    | 60 male   | 16 |
| JHBRC | 6 control    | 54 female | 24 |





| Lab_Name      | Sequence               | Description                                                                                           |
|---------------|------------------------|-------------------------------------------------------------------------------------------------------|
| ACTB-TRANS-1F | CGAGAAGATGACCCAGATCA   | ACTB qPCR (normalization control)                                                                     |
| ACTB-TRANS-1R | AGAGGCGTACAGGGATAGCA   | ACTB qPCR (normalization control)                                                                     |
| MRIPqF        | AGATGCCACGACCCTTC      | MRIP qPCR (normalization control)                                                                     |
| MRIPqR        | GCGTCAGAATACACAGGGAGA  | MRIP qPCR (normalization control)                                                                     |
| POLR2FqF      | CAGACAACGAGGACAATTTTGA | POLR2F qPCR (normalization control)                                                                   |
| POLR2FqR      | TCTTCGGCATTCTCCAAGTC   | POLR2F qPCR (normalization control)                                                                   |
| CLUtrans1qF   | AGCTCCAGGCTTGAGGAGTT   | RT PCR specific to CR617497                                                                           |
| CLUtrans1qR   | GTCGTTCTCCAGCAGGGAGT   | RT PCR specific to CR617497                                                                           |
| CLUtrans2qF   | TGATGGCAAATGGAGGCG     | RT PCR specific to NM_1171138                                                                         |
| CLUtrans2qR   | CTCCCAGGTCAGCAGCAG     | RT PCR specific to NM_1171138                                                                         |
| CLUtrans4qF   | AAGTCTCCACTAGGGATGC    | RT PCR specific to NM_203339                                                                          |
| CLUtrans4qR   | CACGCCTCTGAACTTGACTT   | RT PCR specific to NM_203339                                                                          |
| CLUtrans4qF2  | AAGTTCAGAGGCGTGCAAAG   | RT PCR specific to NM_203339 -alternative                                                             |
| CLUtrans4qR2  | CTCCCAGGTCAGCAGCAG     | RT PCR specific to NM_203339 -alternative                                                             |
| CLUtrans1qF2  | CCTCAAGCCTGGAGCTCAT    | RT PCR specific to CR617497-alternative                                                               |
| CLUtrans1qR2  | GACTCTGCTGCTGTTTGTGG   | RT PCR specific to CR617497-alternative                                                               |
| CLUg2F        | CTGTAACACTGGGGCCTGAT   | sequence under NM_203339 specific qPCR primer CLUtrans4qR                                             |
| CLUg2R        | TCCACTCAACATTGCTGTCC   | sequence under NM_203339 specific qPCR primer CLUtrans4qR                                             |
| CLUrs888F     | CCTCTGCAATGTGCACCTAA   | sequence under CLUtrans4qF/genotyping rs9331888 by sequencing/ genotyping rs9331888 by BslI digestion |
| CLUrs888R     | GGGAAAGGGTCCATTGTGTA   | sequence under CLUtrans4qF/genotyping rs9331888 by sequencing/ genotyping rs9331888 by BslI digestion |
| rs11136000F   | TCTCACTGAAGCCTCATTTC   | repeat genotyping rs11136000 by Restriction digestion with Apol                                       |
| rs11136000R   | GCACCACCACACCAGCTAAT   | repeat genotyping rs11136000 by Restriction digestion with Apol                                       |
| SmallF        | CCACCTGAACTTGACTTTC    | 280bp S- construct instert                                                                            |
| SmallR        | GGGCAGCCTGCTGTCGGC     | 280bp S- construct instert                                                                            |
| UpstreamF     | GCCTCCAATTCTGGAGTCTTTG | 850bp U amplicon with primer SmallR                                                                   |
| DownstreamR   | TTCTGAATGGGTTTTCCAGA   | 850bp U amplicon with primer SmallF                                                                   |
| pGLR 5'       | CGGGACTATGGTTGCTGACT   | pGLR sequencing primer                                                                                |
